# Supplementary material
Source: PubMed Central journal article supplement (PMC7121860)

**A**

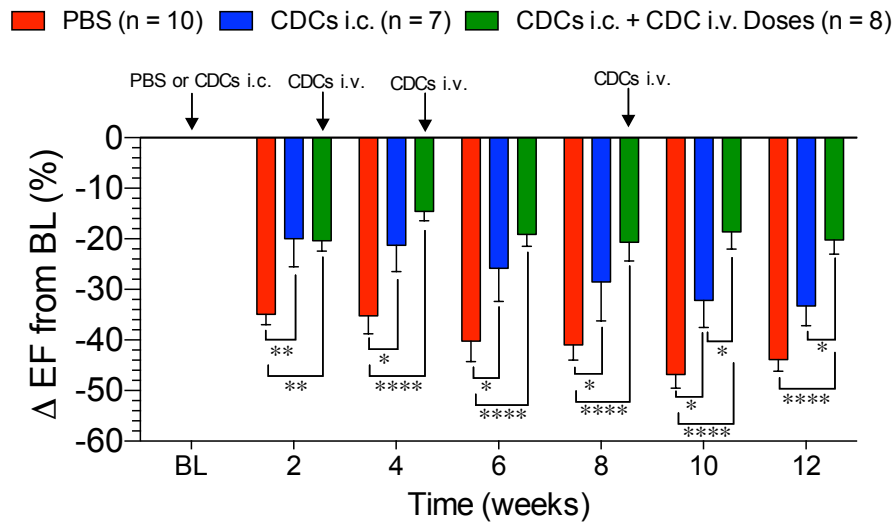

**B**

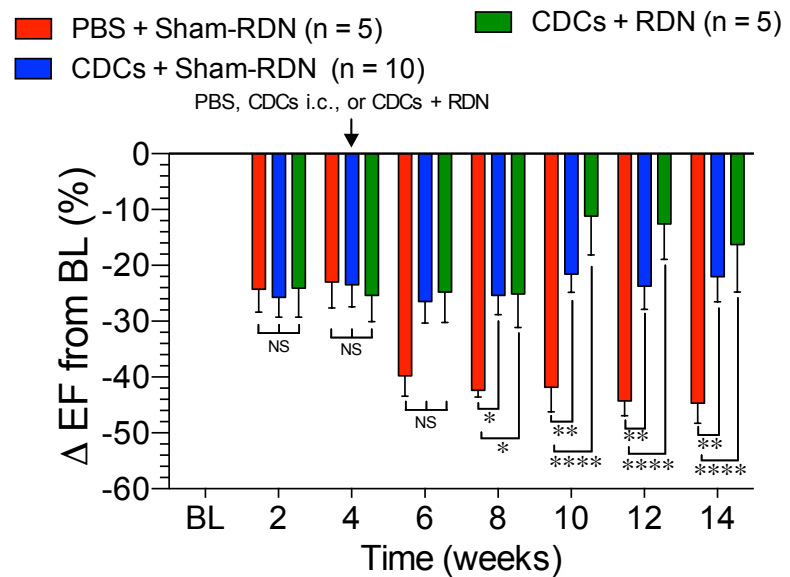

**C**

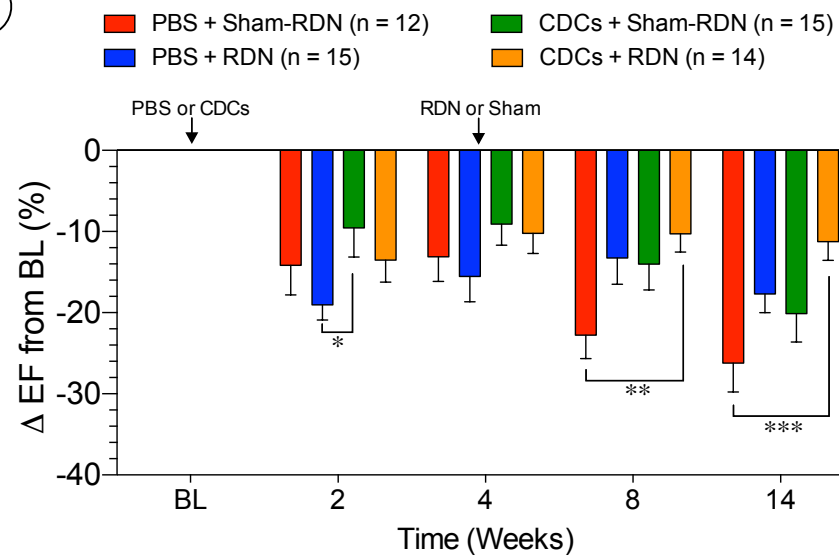

Supplement: NIHMS1562380-supplement-Supplemental_Figure.pdf [file NIHMS1562380-supplement-Supplemental_Figure.pdf]
